# Supplementary material for: Ultrathin Co–Fe hydroxide nanosheet arrays for improved oxygen evolution during water splitting
Source: Royal Society of Chemistry journal article supplement (doi:10.1039/c7ra01202k), 2017-01-01
Supplement: c7ra01202k1.pdf [file c7ra01202k1.pdf]

Supplementary Information

**Ultrathin Co-Fe Hydroxide Nanosheet Arrays for Improved  
Oxygen Evolution during Water Splitting**

Tingting Zhou,<sup>[a,b]</sup> Zhen Cao,<sup>[a]</sup> Heng Wang,<sup>[a]</sup> Zhen Gao,<sup>[a]</sup> Long Li,<sup>[a]</sup> Houyi Ma<sup>[b]</sup> and Yunfeng Zhao<sup>[a]\*</sup>

- a. Tianjin Key Laboratory of Advanced Functional Porous Materials, Institute for New Energy Materials and Low-Carbon Technologies, Tianjin University of Technology, Tianjin 300384, China School of Chemistry and
- b. Chemical Engineering, Shandong University, Jinan 250100, China.

**Table S1.** ICP results of  $\text{Co}_y\text{Fe}_{1-y}(\text{OH})_x$  NSAs.

| Number | Feed ratio of<br>Co:Fe | Content of Co<br>(mg/cm <sup>2</sup> ) | Content of Fe<br>(mg/cm <sup>2</sup> ) | Atom ratio<br>(Co : Fe) | y    |
|--------|------------------------|----------------------------------------|----------------------------------------|-------------------------|------|
| 1      | 1:0                    | 0.37                                   | 0                                      | ----                    | 1    |
| 2      | 3:1                    | 0.38                                   | 0.13                                   | 1:0.34                  | 0.75 |
| 3      | 2:1                    | 0.39                                   | 0.16                                   | 1:0.41                  | 0.7  |
| 4      | 1:1                    | 0.28                                   | 0.23                                   | 1:0.82                  | 0.55 |
| 5      | 1:2                    | 0.22                                   | 0.31                                   | 1:1.40                  | 0.41 |
| 6      | 0:1                    | 0                                      | 0.39                                   | ----                    | 0    |

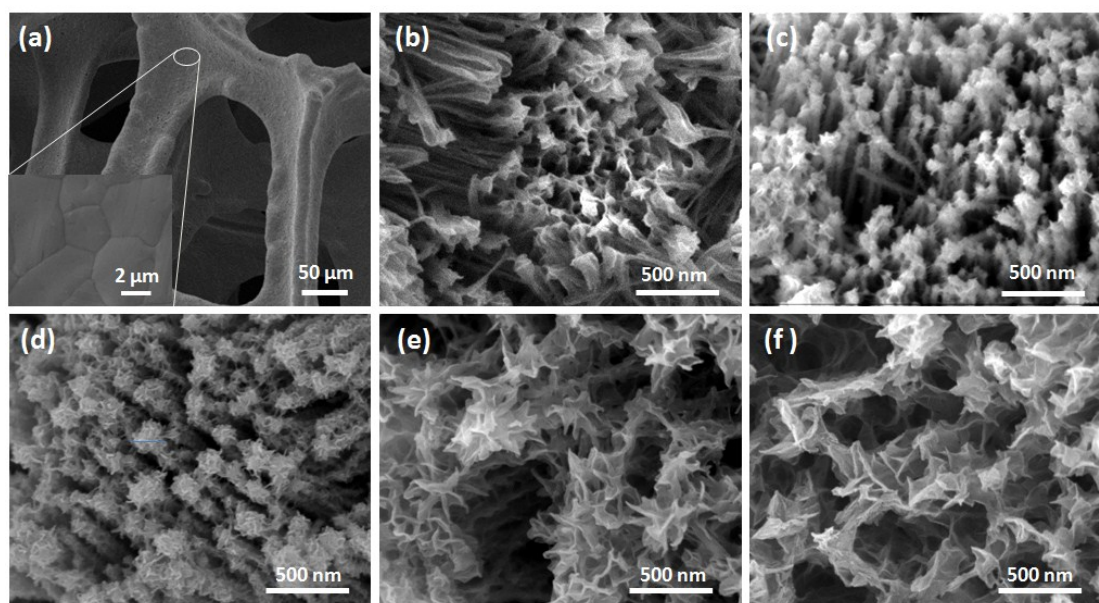

**Fig. S1.** SEM images of (a) foam Cu, (b)  $\text{Co(OH)}_2$  NSAs, (c)  $\text{Co}_{0.75}\text{Fe}_{0.25}(\text{OH})_x$  NSAs, (d)  $\text{Co}_{0.55}\text{Fe}_{0.45}(\text{OH})_x$  NSAs, (e)  $\text{Co}_{0.41}\text{Fe}_{0.59}(\text{OH})_x$  NSAs and (f)  $\text{Fe(OH)}_x$  NSAs.

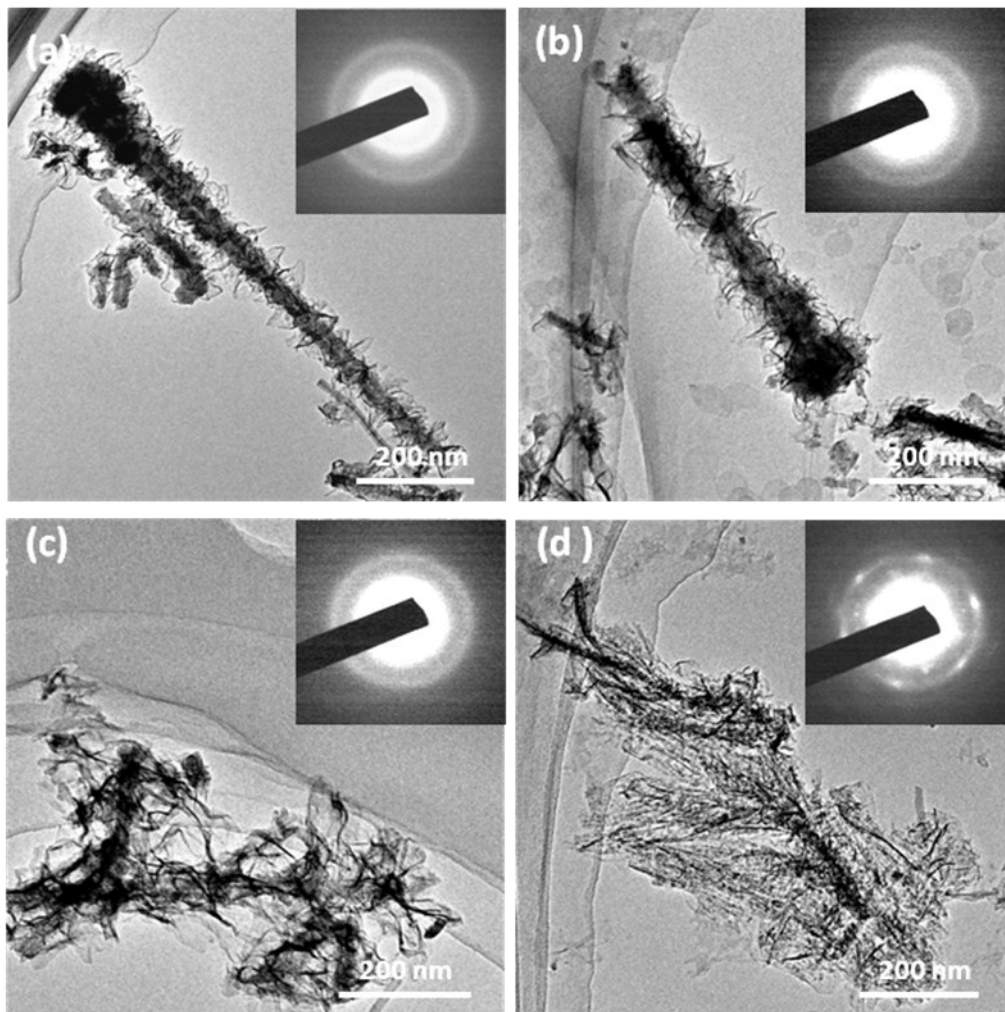

**Fig. S2.** TEM images and (inset) SAED patterns of (a)  $\text{Co}_{0.75}\text{Fe}_{0.25}(\text{OH})_x$  NSAs, (b)  $\text{Co}_{0.55}\text{Fe}_{0.45}(\text{OH})_x$  NSAs, (c)  $\text{Co}_{0.41}\text{Fe}_{0.59}(\text{OH})_x$  NSAs and (d)  $\text{Fe}_2\text{O}_3$  NSAs.

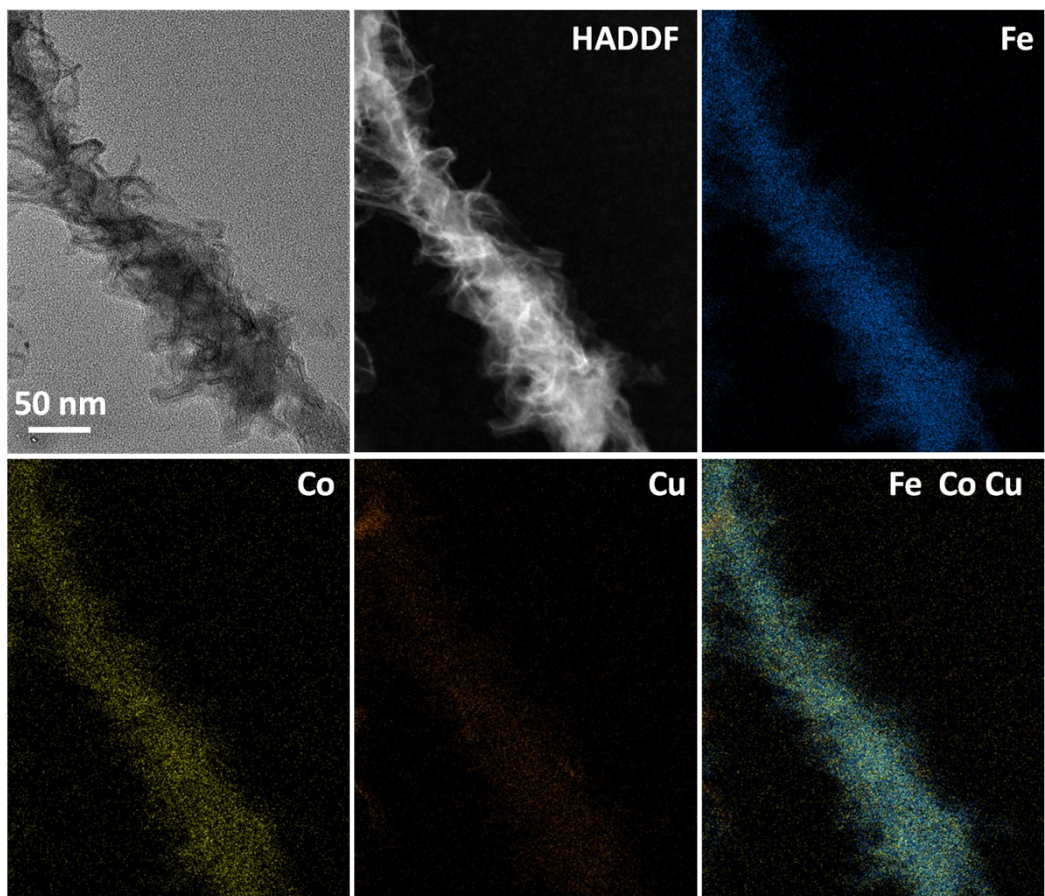

**Fig. S3.** The TEM image and corresponding Co, Fe and Cu EDS mapping images of  $\text{Co}_{0.70}\text{Fe}_{0.30}(\text{OH})_x$  NSAs.

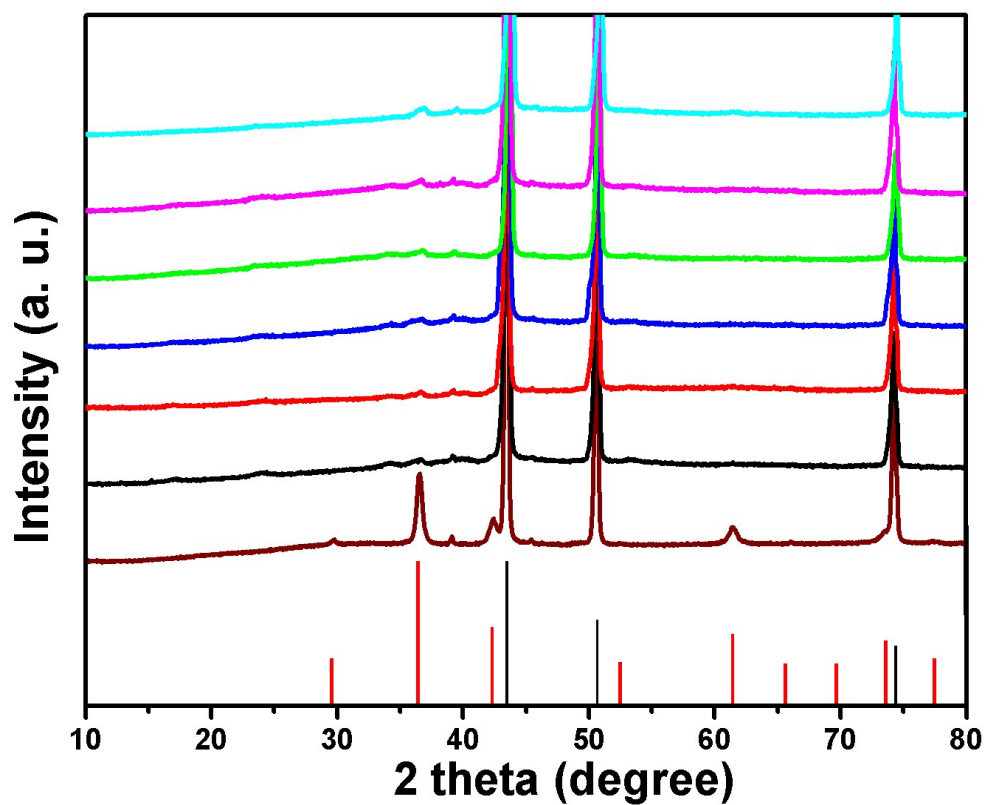

**Fig. S4.** XRD patterns for Cu<sub>2</sub>O template, Co(OH)<sub>2</sub>, Co<sub>0.75</sub>Fe<sub>0.25</sub>(OH)<sub>x</sub>, Co<sub>0.70</sub>Fe<sub>0.30</sub>(OH)<sub>x</sub>, Co<sub>0.55</sub>Fe<sub>0.45</sub>(OH)<sub>x</sub>, Co<sub>0.41</sub>Fe<sub>0.59</sub>(OH)<sub>x</sub> and Fe<sub>2</sub>O<sub>3</sub> NSAs (lines from bottom to top). The peaks are indexed using reference peaks from the appropriate PDF cards: Cu<sub>2</sub>O phases (red, PDF#65-3288) and Cu phases (black, PDF# 65-9743).

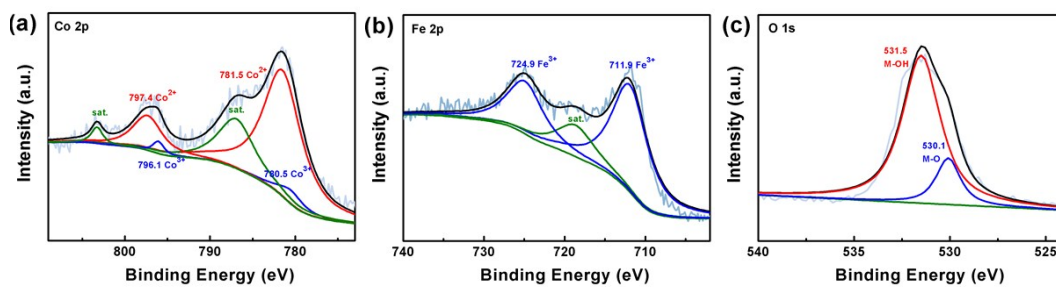

**Fig. S5.** High-resolution XPS spectra of (a) Co 2p, (b) Fe 2p and (c) O 1s of  $\text{Co}_{0.75}\text{Fe}_{0.25}(\text{OH})_x$  NSAs.

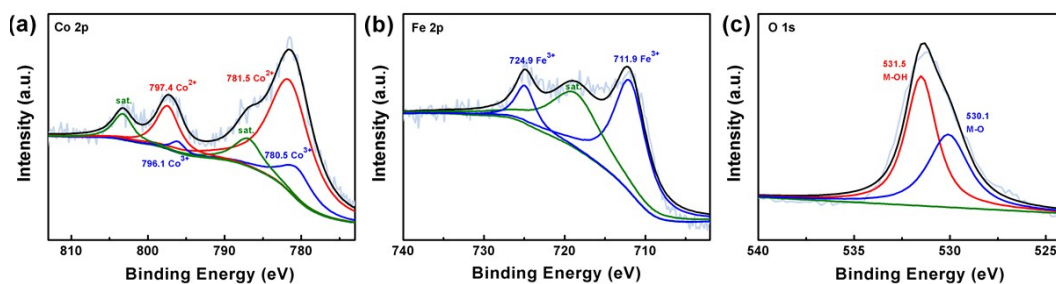

**Fig. S6.** High-resolution XPS spectra of (a) Co 2p, (b) Fe 2p and (c) O 1s of  $\text{Co}_{0.55}\text{Fe}_{0.45}(\text{OH})_x$  NSAs.

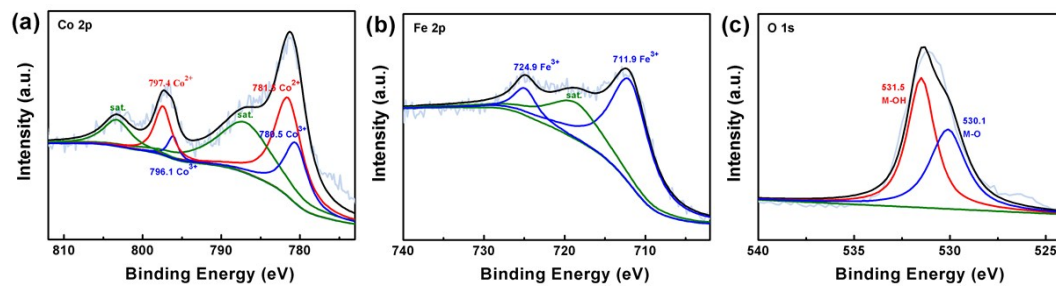

**Fig. S7.** High-resolution XPS spectra of (a) Co 2p, (b) Fe 2p and (c) O 1s of  $\text{Co}_{0.41}\text{Fe}_{0.59}(\text{OH})_x$  NSAs.

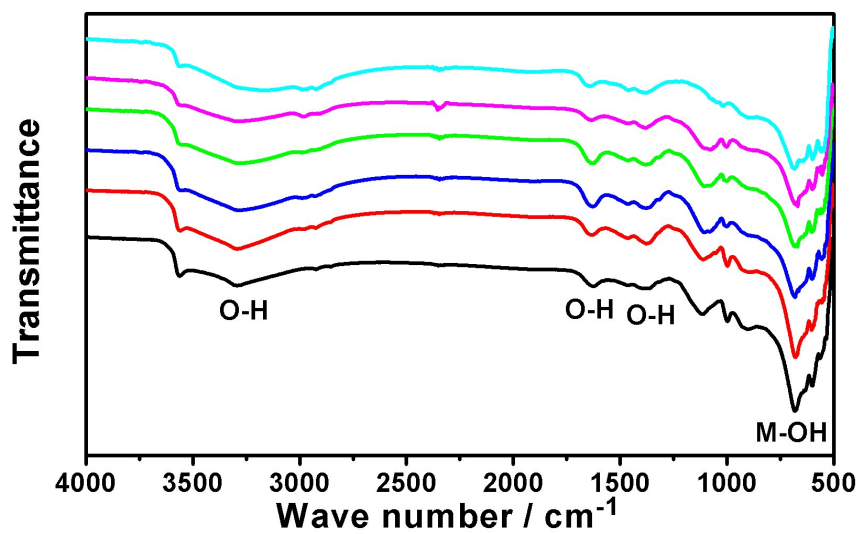

**Fig. S8.** Infrared spectra of  $\text{Co}(\text{OH})_2$ ,  $\text{Co}_{0.75}\text{Fe}_{0.25}(\text{OH})_x$ ,  $\text{Co}_{0.70}\text{Fe}_{0.30}(\text{OH})_x$ ,  $\text{Co}_{0.55}\text{Fe}_{0.45}(\text{OH})_x$ ,  $\text{Co}_{0.41}\text{Fe}_{0.59}(\text{OH})_x$  and  $\text{Fe}_2\text{O}_3$  NSAs (lines from bottom to top).



**Table S2.** OER catalytic performances of  $\text{Co}_y\text{Fe}_{1-y}(\text{OH})_x$  NSAs in 1 M KOH.

| Catalyst                                                  | Onset $\eta$<br>(mV) | $\eta$ at<br>10 mA cm <sup>-2</sup><br>(mV) | $\eta$ at<br>100 mA cm <sup>-2</sup><br>(mV) | Tafel Slope<br>(mV/dec) | TOF at<br>$\eta=380$ mV<br>(s <sup>-1</sup> ) |
|-----------------------------------------------------------|----------------------|---------------------------------------------|----------------------------------------------|-------------------------|-----------------------------------------------|
| <b>Co(OH)<sub>2</sub></b>                                 | 250                  | 270                                         | 347                                          | 74.9                    | 0.081                                         |
| <b>Co<sub>0.75</sub>Fe<sub>0.25</sub>(OH)<sub>x</sub></b> | 235                  | 250                                         | 320                                          | 67.3                    | 0.103                                         |
| <b>Co<sub>0.70</sub>Fe<sub>0.30</sub>(OH)<sub>x</sub></b> | 220                  | 245                                         | 310                                          | 62.4                    | 0.172                                         |
| <b>Co<sub>0.55</sub>Fe<sub>0.45</sub>(OH)<sub>x</sub></b> | 220                  | 248                                         | 315                                          | 65.4                    | 0.126                                         |
| <b>Co<sub>0.41</sub>Fe<sub>0.59</sub>(OH)<sub>x</sub></b> | 225                  | 262                                         | 330                                          | 68.9                    | 0.076                                         |
| <b>Fe<sub>2</sub>O<sub>3</sub></b>                        | 270                  | 325                                         | 375                                          | 50.9                    | 0.045                                         |

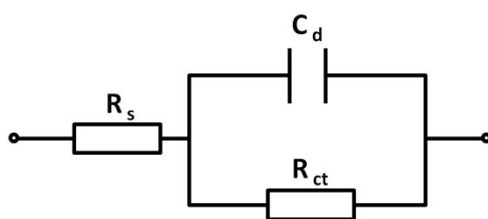

**Fig. S9.** Equivalent circuit used for fitting the EIS data.

**Table S3.** Fitting results of  $\text{Co}_y\text{Fe}_{1-y}(\text{OH})_x$  NSAs.

| Material                                        | $R_s$ ( $\Omega$ ) | $R_{ct}$ ( $\Omega$ ) | $R_{cp}$ ( $\Omega$ ) |
|-------------------------------------------------|--------------------|-----------------------|-----------------------|
| $\text{Co}(\text{OH})_2$                        | 2.22               | 3.57                  | 0.21                  |
| $\text{Co}_{0.75}\text{Fe}_{0.25}(\text{OH})_x$ | 3.62               | 4.08                  | 0.09                  |
| $\text{Co}_{0.70}\text{Fe}_{0.30}(\text{OH})_x$ | 3.20               | 2.91                  | 0.16                  |
| $\text{Co}_{0.55}\text{Fe}_{0.45}(\text{OH})_x$ | 2.74               | 3.53                  | 8.12                  |
| $\text{Co}_{0.41}\text{Fe}_{0.59}(\text{OH})_x$ | 3.18               | 9.64                  | 3.68                  |
| $\text{Fe}_2\text{O}_3$                         | 3.74               | 24.4                  | 0.089                 |

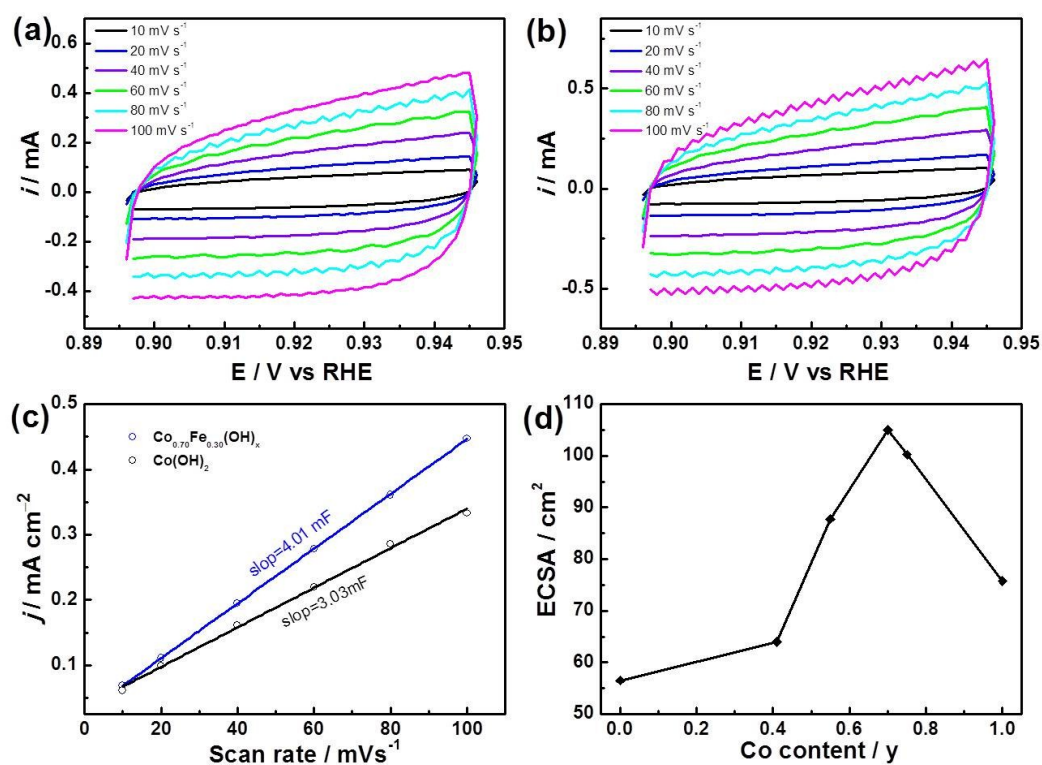

**Fig. S10.** Cyclic voltammetry curves of (a) Co(OH)<sub>2</sub> and (b) Co<sub>0.70</sub>Fe<sub>0.30</sub>(OH)<sub>x</sub> NSAs, (c) the cathodic charging currents measured at 0.92 V vs RHE plotted as a function of scan rate for Co(OH)<sub>2</sub> and Co<sub>0.70</sub>Fe<sub>0.30</sub>(OH)<sub>x</sub> NSAs, (d) ECSA of Co<sub>y</sub>Fe<sub>1-y</sub>(OH)<sub>x</sub> NSAs.

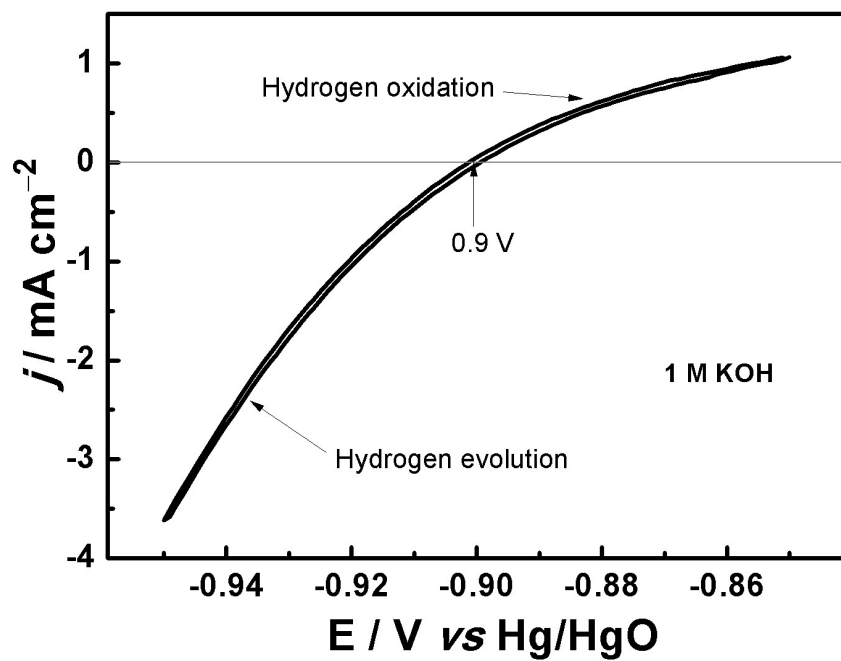

Fig. S11. Hg/HgO (1 M KOH) electrode calibrate with a 1M KOH solution.

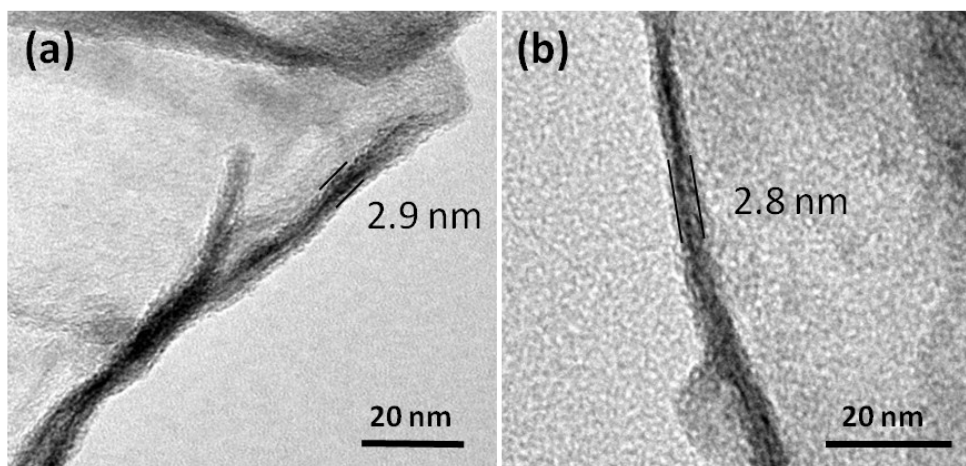

**Fig. S12** TEM images of  $\text{Co}_{0.70}\text{Fe}_{0.30}(\text{OH})_x$  NSAs edge curled nanosheets.

**Table S4.** The OER activities of some Co-based electrocatalysts for water oxidation under alkaline solution.

| Catalyst                                                    | Electrolyte | Onset $\eta$ (mV) | $\eta$ at 10 mA cm <sup>-2</sup> (mV) | Tafel Slope (mV dec <sup>-1</sup> ) | TOF (s <sup>-1</sup> )  | Mass loading (mg cm <sup>-2</sup> ) | Ref. |
|-------------------------------------------------------------|-------------|-------------------|---------------------------------------|-------------------------------------|-------------------------|-------------------------------------|------|
| NiCo <sub>2</sub> O <sub>4</sub> core-shell nanowire        | 1 M NaOH    | 270               | 320                                   | 63.1                                | NA                      | NA                                  | [1]  |
| Mesoporous Ni sphere array                                  | 0.1 M KOH   | 190               | 254                                   | 39                                  | 0.0281 ( $\eta=450$ mV) | 0.2                                 | [2]  |
| Zn <sub>x</sub> Co <sub>3-x</sub> O <sub>4</sub> nanoarrays | 0.1 M KOH   | NA                | 320                                   | 51                                  | NA                      | 0.2                                 | [3]  |
| Ni <sub>2</sub> P nanowires                                 | 1.0 M KOH   | 310               | 400                                   | 60                                  | NA                      | 0.1                                 | [4]  |
| Co <sub>3</sub> O <sub>4</sub> Nanoparticles                | 1 M KOH     | 320               | 370                                   | 62                                  | NA                      | 0.325                               | [5]  |
| Co <sub>3</sub> O <sub>4</sub> nanocube/CoO                 | 1 M KOH     | NA                | 430                                   | 89                                  | NA                      | 56.5                                | [6]  |
| CoO <sub>x</sub> nanotube                                   | 1 M KOH     | 230               | NA                                    | 75                                  | NA                      | 0.136                               | [7]  |
| Ni-V LDH                                                    | 1 M KOH     | 250               | 300                                   | 50                                  | 0.054 ( $\eta=350$ mV)  | 0.143                               | [8]  |
| NiCoO <sub>x</sub> hollow nanosponges                       | 0.1 M KOH   | 271               | 362                                   | 73.2                                | NA                      | 0.2                                 | [9]  |
| Screw CoNi LDH/C                                            | 1M KOH      | 330               | 360                                   | 38.5                                | NA                      | 2                                   | [10] |
| NiCo/NF or NiCo/CP                                          | 1 M KOH     | NA                | 360                                   | 50-60                               | NA                      | 0.4                                 | [11] |
| NiCoO <sub>x</sub> nanoarray                                | 1 M KOH     | 280               | 290                                   | 79                                  | NA                      | 3                                   | [12] |
| Co-S nanosheets film                                        | 1 M KOH     | 320               | 361                                   | 64                                  | NA                      | NA                                  | [13] |
| NiCo hydroxide                                              | 0.1 M KOH   | 310               | 460                                   | 65                                  | NA                      | NA                                  | [14] |
| Hollow fluffy cages                                         | 1 M KOH     | NA                | 409                                   | 70                                  | 0.0167 ( $\eta=400$ mV) | 0.14                                | [15] |
| Ni <sub>2/3</sub> Fe <sub>1/3</sub> -rGO                    | 1 M KOH     | 210               | 230                                   | 40                                  | 0.1 ( $\eta=300$ mV)    | 0.25                                | [16] |
| Ni <sub>3</sub> S <sub>2</sub> nanorods/NF                  | 0.1 M KOH   | 157               | 187                                   | 153                                 | NA                      | NA                                  | [17] |
| Fe-Ni/NF                                                    | 1MKOH       | 200               | NA                                    | 32                                  | 0.075 ( $\eta=400$ mV)  | NA                                  | [18] |
| CoFe <sub>2</sub> O <sub>4</sub> nanoparticles              | 1M NaOH     | 270               | 378                                   | 73                                  | NA                      | 1.031                               | [19] |
| CoFe-LDH                                                    | 0.1 M KOH   | 260               | 325                                   | 43                                  | 0.12 ( $\eta=350$ mV)   | 0.2                                 | [20] |
| FeOOH/Co/FeOOH Hybrid Arrays                                | 1M NaOH     | 230               | NA                                    | 32                                  | 5.6 ( $\eta=300$ mV)    | 0.5                                 | [21] |

## Notes and references

- [1] R. Chen, H.-Y. Wang, J. Miao, H. Yang and B. Liu, *Nano Energy* **2015**, *11*, 333-340.
- [2] T. Sun, L. Xu, Y. Yan, A. A. Zakhidov, R. H. Baughman and J. Chen, *ACS Catal.* **2016**, *6*, 1446-1450.
- [3] X. Liu, Z. Chang, L. Luo, T. Xu, X. Lei, J. Liu and X. Sun, *Chem. Mater.* **2014**, *26*, 1889-1895.
- [4] A. Han, H. Chen, Z. Sun, J. Xu and P. Du, *Chem. Commun.* **2015**, *51*, 11626-11629.
- [5] Xinzhe Li, Yiyun Fang, Xiaoqing Lin, Min Tian, Xingcai An, Yan Fu, Rong Li, Jun Jina and J. Maa, *J. Mater. Chem. A* **2015**, *3*, 17392-17402.
- [6] A. Bergmann, E. Martinez-Moreno, D. Teschner, P. Chernev, M. Gliech, J. F. de Araujo, T. Reier, H. Dau and P. Strasser, *Nat. Commun.* **2015**, *6*, 8625.
- [7] Y. Wang, K. Jiang, H. Zhang, T. Zhou, J. Wang, W. Wei, Z. Yang, X. Sun, W.-B. Cai and G. Zheng, *Adv. Sci.* **2015**, *2*, 1500003.
- [8] K. Fan, H. Chen, Y. Ji, H. Huang, P. M. Claesson, Q. Daniel, B. Philippe, H. Rensmo, F. Li, Y. Luo and L. Sun, *Nat Commun* **2016**, *7*, 11981.
- [9] C. Zhu, D. Wen, S. Leubner, M. Oschatz, W. Liu, M. Holzschuh, F. Simon, S. Kaskelb and A. Eychmuller, *Chem. Commun.* **2015**, *51*, 7851--7854.
- [10] B. Ni and X. Wang, *Chem. Sci.* **2015**, *6*, 3572-3576.
- [11] Y. Xiao, L. Feng, C. Hu, V. Fateev, C. Liu and W. Xing, *RSC Adv.* **2015**, *5*, 61900-61905.
- [12] Z. Lu, M. Sun, T. Xu, Y. Li, W. Xu, Z. Chang, Y. Ding, X. Sun and L. Jiang, *Adv. Mater.* **2015**, *27*, 2361-2366.
- [13] T. Liu, Y. Liang, Q. Liu, X. Sun, Y. He and A. M. Asiri, *Electrochem. Commun.* **2015**, *60*, 92-96.
- [14] Z. Zhao, H. Wu, H. He, X. Xu and Y. Jin, *Adv. Funct. Mater.* **2014**, *24*, 4698-4705.
- [15] X. Zhou, X. Shen, Z. Xia, Z. Zhang, J. Li, Y. Ma and Y. Qu, *ACS Appl. Mater. Inter.* **2015**, *7*, 20322-20331.
- [16] M. Wei, M. Renzhi, W. Chengxiang, L. Jianbo, L. Xiaohe, Z. Kechao and T. Sasaki, *ACS Nano* **9**, 1977-1984.
- [17] W. Zhou, X.-J. Wu, X. Cao, X. Huang, C. Tan, J. Tian, H. Liu, J. Wang and H. Zhang, *Energy. Environ. Sci.* **2013**, *6*, 2921.
- [18] X. Lu and C. Zhao, *Nat. Commun.* **2015**, *6*, 6616.
- [19] A. Kargar, S. Yavuz, T. K. Kim, C. H. Liu, C. Kuru, C. S. Rustomji, S. Jin and P. R. Bandaru, *ACS Appl. Mater. Inter.* **2015**, *7*, 17851-17856.
- [20] X. Han, C. Yu, J. Yang, C. Zhao, H. Huang, Z. Liu, P. M. Ajayan and J. Qiu, *Adv. Mater. Interface.* **2016**, *3*, 15000782.
- [21] J. X. Feng, H. Xu, Y. T. Dong, S. H. Ye, Y. X. Tong and G. R. Li, *Angew. Chem. Int. Ed.* **2016**, *55*, 3694-3698.
